# Supplementary material for: A mouse model with widespread expression of the C9orf72-linked glycine-arginine dipeptide displays non-lethal ALS/FTD-like phenotypes
Source: Research Square preprint supplement (doi:10.21203/rs.3.rs-1096745/v2), 2022-02-28
Supplement: Supplementary file 1 [file 09e2f71a88f172fc0f97ac6a.docx]

Western blots included in Verdone et al.

**Figure 2B anti-GR:**

Colorimetric:


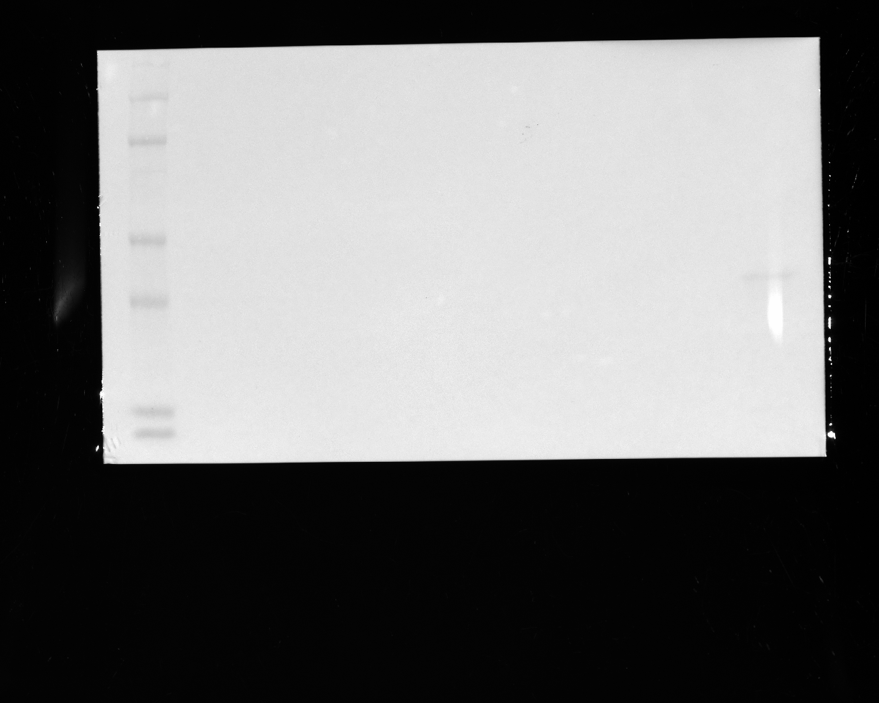


Chemiluminescence:


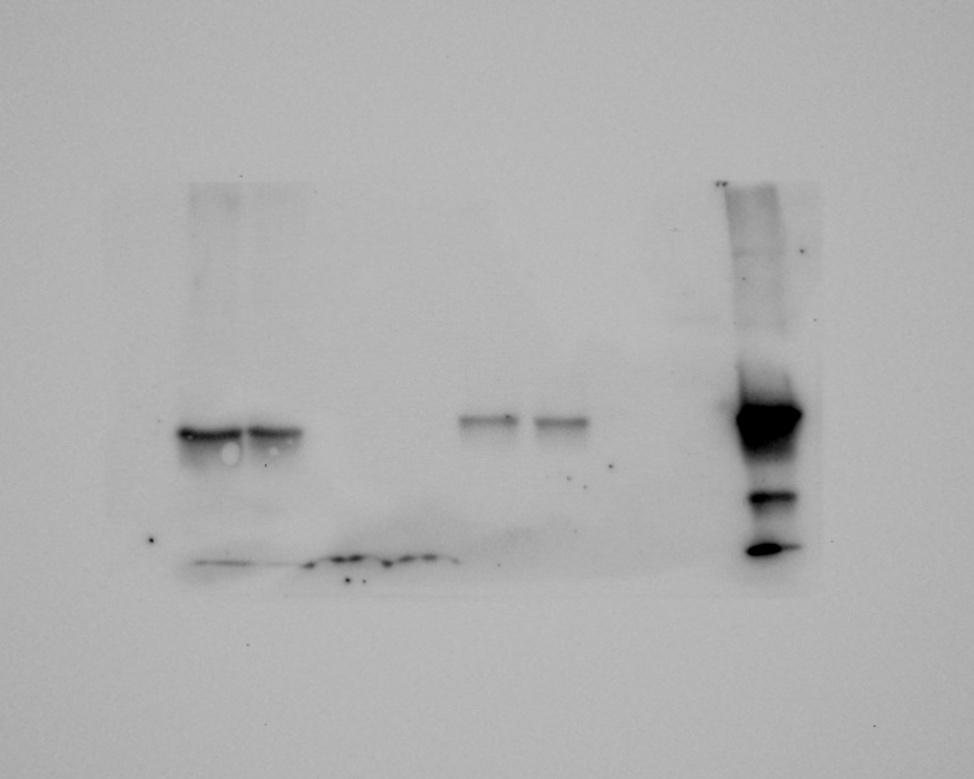


Lanes:

1. Ladder
2. Cortex GR mouse 1
3. Cortex GR mouse 2
4. Cortex GFP mouse 1
5. Cortex GFP mouse 2
6. Spinal Cord mouse 1
7. Spinal Cord mouse 2
8. Spinal Cord mouse 1
9. Spinal Cord mouse 2
10. HEK Cell lysate transfected with GR50-GFP

**Figure 2B anti-GFP**

Colorimetric:


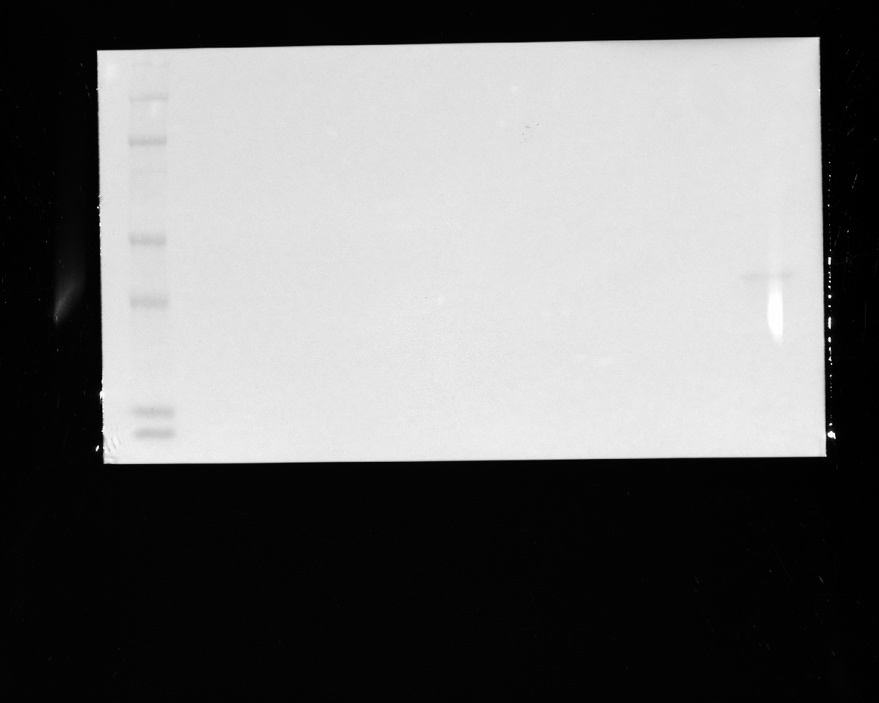


Chemiluminescence:


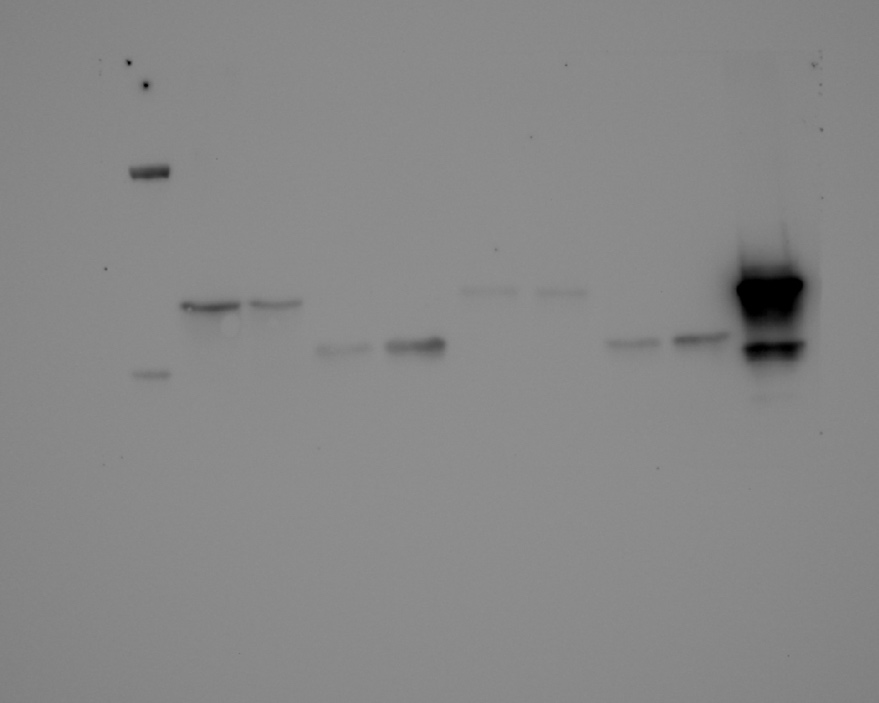


Lanes:

1. Ladder
2. Cortex GR mouse 1
3. Cortex GR mouse 2
4. Cortex GFP mouse 1
5. Cortex GFP mouse 2
6. Spinal Cord mouse 1
7. Spinal Cord mouse 2
8. Spinal Cord mouse 1
9. Spinal Cord mouse 2
10. HEK Cell lysate transfected with GR50-GFP

**Supplemental Figure 2A: GR50 mouse; anti-GR**

Chemiluminescence:

**
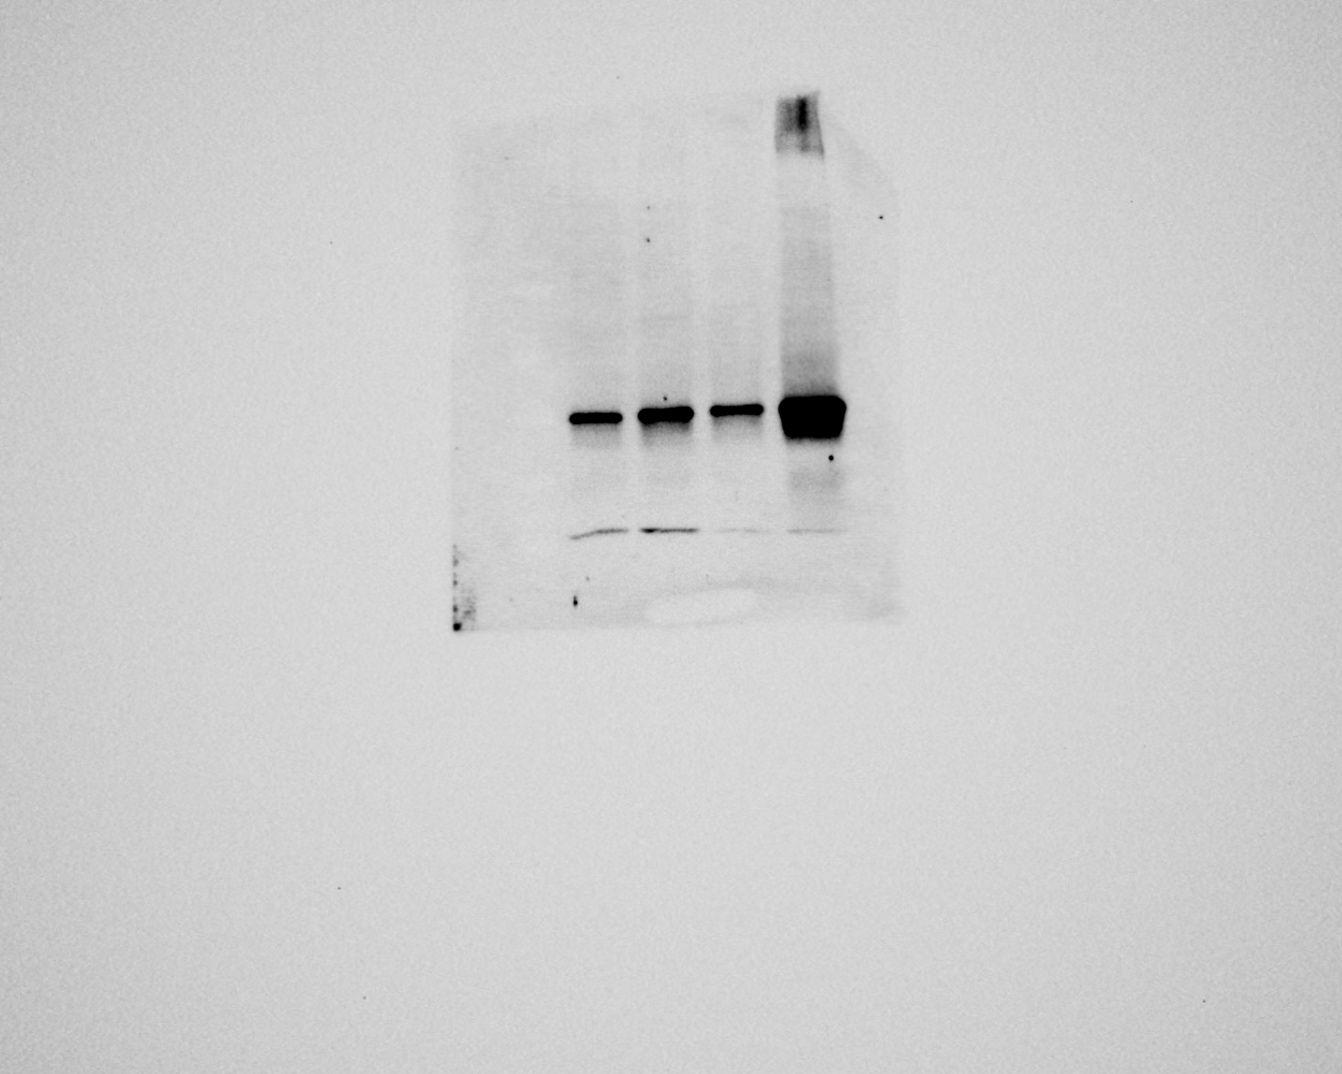
**

Lanes:

1. Ladder
2. GR mouse cortex
3. GR mouse cerebellum
4. GR mouse spinal cord
5. GR mouse liver

**Supplemental Figure 2A: GR50 mouse; anti-GFP**

Chemiluminescence:

**
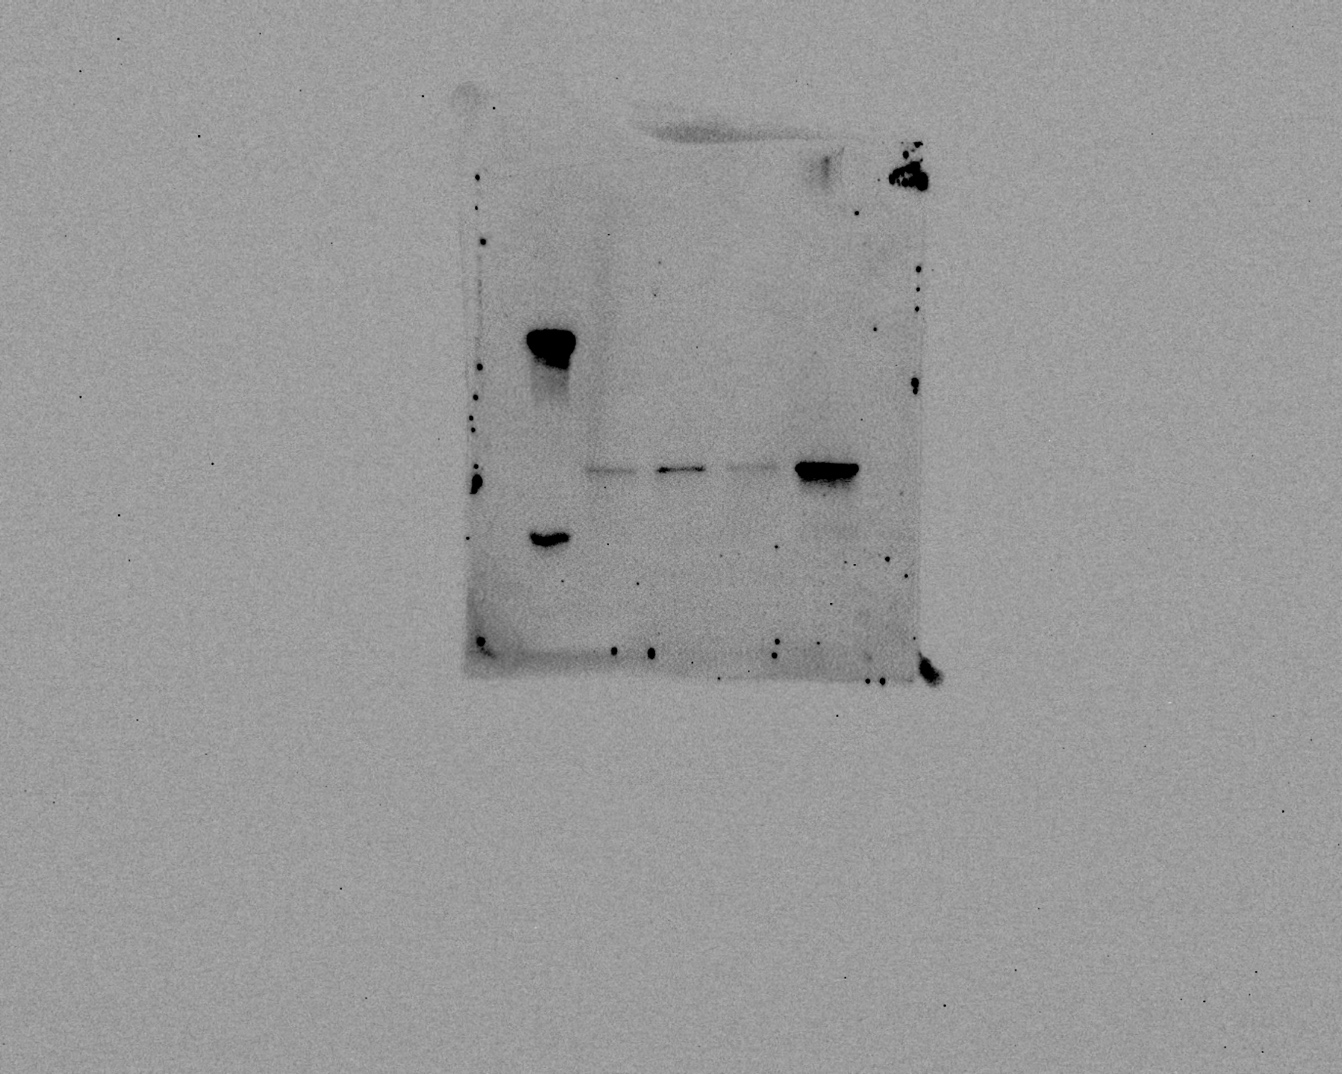
**

Lanes:

1. Ladder
2. GR mouse cortex
3. GR mouse cerebellum
4. GR mouse spinal cord
5. GR mouse liver

**Supplemental Figure 2A: GR50 mouse; anti-beta tubulin**

Chemiluminescence:

**
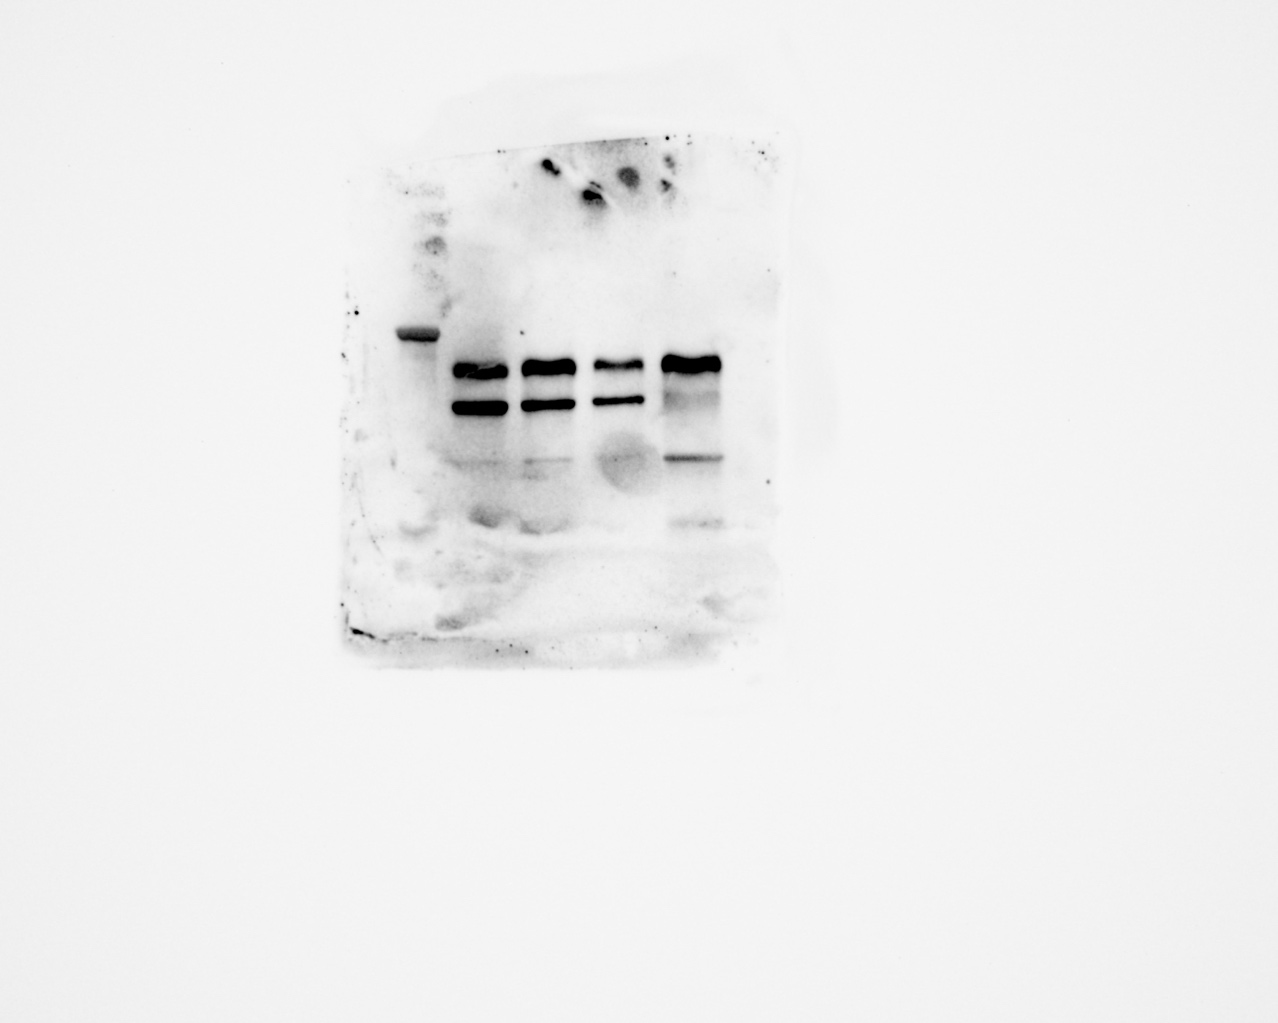
**

Lanes:

1. Ladder
2. GR mouse cortex
3. GR mouse cerebellum
4. GR mouse spinal cord
5. GR mouse liver

**Supplemental Figure 2D: GFP mouse; anti-GFP**

Chemiluminescence:

**
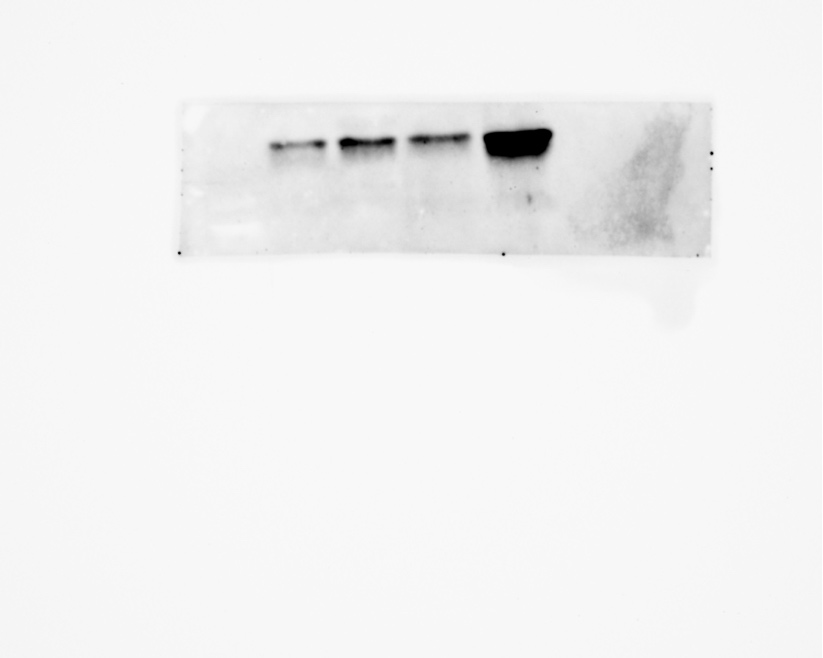
**

Lanes:

1. Ladder
2. GFP mouse cortex
3. GFP mouse cerebellum
4. GFP mouse spinal cord
5. GFP mouse liver

**Supplemental Figure 2D: GFP mouse; anti-beta tubulin**

Chemiluminescence:

**
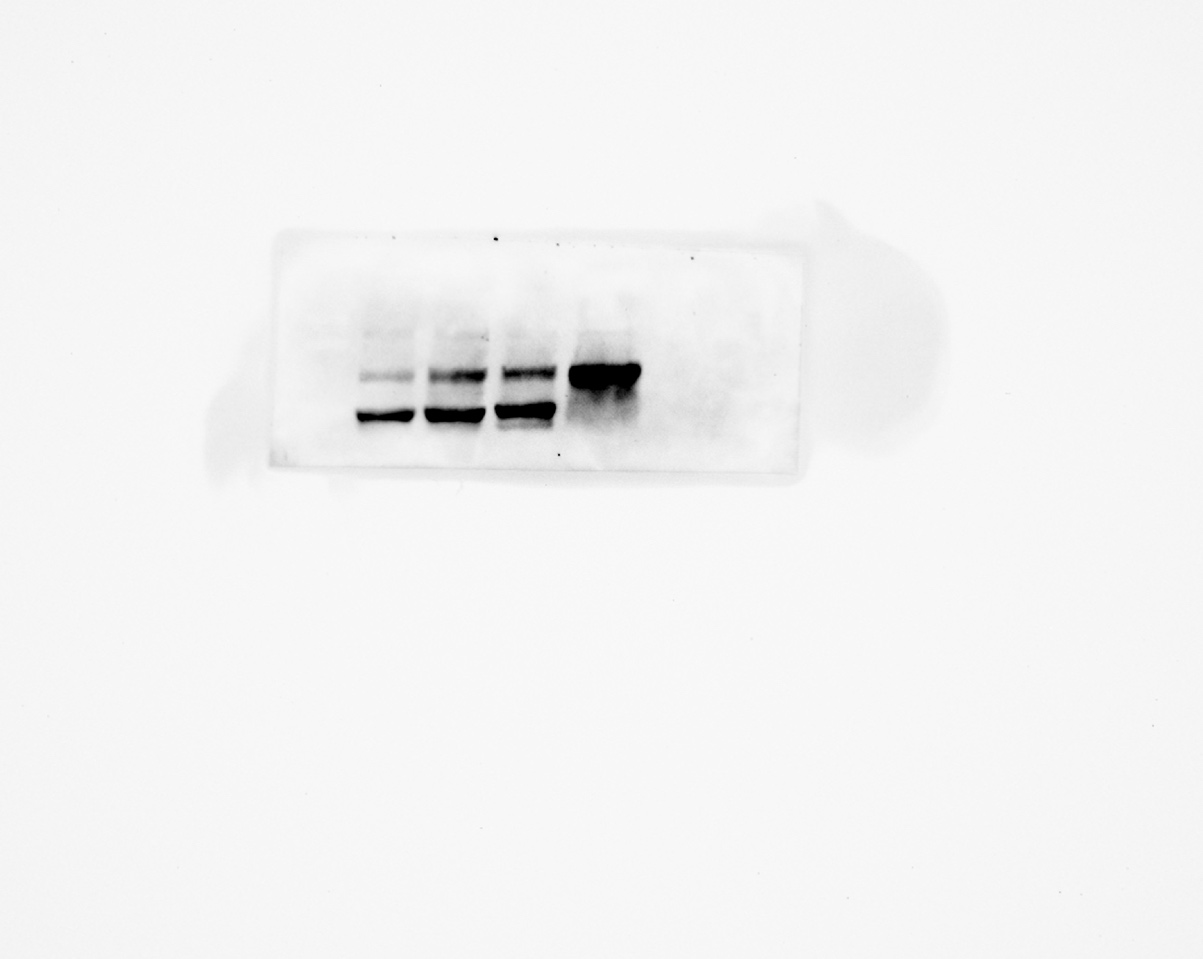
**

Lanes:

1. Ladder
2. GFP mouse cortex
3. GFP mouse cerebellum
4. GFP mouse spinal cord
5. GFP mouse liver
